# Supplementary material for: Some Aspects of the Physiology of the Nyctotherus velox, a Commensal Ciliated Protozoon Taken from the Hindgut of the Tropical Millipede Archispirostreptus gigas
Source: MDPI journal article supplement (doi:10.3390/life13051110), 2023-04-29
Supplement: s1 [file s1]

## Supplementary material

Supplementary Table S1: Accession numbers of the 18S rDNA gene sequences of the commensal ciliates isolated from the African millipede *Archispirostreptus gigas*.

| Species name                                 | Isolate label | GenBank Accession number | Collection year | Country of origin of the host | Locality                            | Host Organism                                  | Source                       |
|----------------------------------------------|---------------|--------------------------|-----------------|-------------------------------|-------------------------------------|------------------------------------------------|------------------------------|
| <i>Nyctotherus velox</i> (Leidy, 1849)       | 2K_AG         | OQ474962                 | 2012            | Tanzania                      | Laboratory breeding, Czech Republic | <i>Archispirostreptus gigas</i> (Peters, 1868) | Ciliate culture from hindgut |
| <i>Nyctotherus velox</i> (Leidy, 1849)       | 3K_AG         | OQ474963                 | 2012            | Tanzania                      | Laboratory breeding, Czech Republic | <i>Archispirostreptus gigas</i> (Peters, 1868) | Ciliate culture from hindgut |
| <i>Nyctotherus velox</i> (Leidy, 1849)       | 4K_AG         | OQ474964                 | 2012            | Tanzania                      | Laboratory breeding, Czech Republic | <i>Archispirostreptus gigas</i> (Peters, 1868) | Ciliate culture from hindgut |
| <i>Nyctotherus velox</i> (Leidy, 1849)       | 6K_AG         | OQ474965                 | 2012            | Tanzania                      | Laboratory breeding, Czech Republic | <i>Archispirostreptus gigas</i> (Peters, 1868) | Ciliate culture from hindgut |
| <i>Nyctotherus velox</i> (Leidy, 1849)       | 7K_AG         | OQ474966                 | 2012            | Tanzania                      | Laboratory breeding, Czech Republic | <i>Archispirostreptus gigas</i> (Peters, 1868) | Ciliate culture from hindgut |
| <i>Nyctotherus velox</i> (Leidy, 1849)       | 8K_AG         | OQ474967                 | 2012            | Tanzania                      | Laboratory breeding, Czech Republic | <i>Archispirostreptus gigas</i> (Peters, 1868) | Ciliate culture from hindgut |
| <i>Nyctotherus velox</i> (Leidy, 1849)       | 9K_AG         | OQ474968                 | 2012            | Tanzania                      | Laboratory breeding, Czech Republic | <i>Archispirostreptus gigas</i> (Peters, 1868) | Ciliate culture from hindgut |
| <i>Nyctotherus velox</i> (Leidy, 1849)       | 10K_AG        | OQ474969                 | 2012            | Tanzania                      | Laboratory breeding, Czech Republic | <i>Archispirostreptus gigas</i> (Peters, 1868) | Ciliate culture from hindgut |
| <i>Nyctotherus archispirostreptae</i> n. sp. | 3E_AG         | OQ474960                 | 2012            | Tanzania                      | Laboratory breeding, Czech Republic | <i>Archispirostreptus gigas</i> (Peters, 1868) | Hindgut content              |
| <i>Nyctotherus archispirostreptae</i> n. sp. | 8E_AG         | OQ474959                 | 2012            | Tanzania                      | Laboratory breeding, Czech Republic | <i>Archispirostreptus gigas</i> (Peters, 1868) | Hindgut content              |
| <i>Nyctotherus velox</i> (Leidy, 1849)       | 11E_AG        | OQ474961                 | 2012            | Tanzania                      | Laboratory breeding, Czech Republic | <i>Archispirostreptus gigas</i> (Peters, 1868) | Hindgut content              |

Supplementary Table S2: Accession numbers of the 18S rDNA  
gene sequences of the ciliates used in the phylogenetic tree

| Species name                        | GenBank          |
|-------------------------------------|------------------|
|                                     | Accession number |
| <i>Nyctotherus velox</i>            | AJ006713.1       |
| <i>Anteclevelandella constricta</i> | MT675973.1       |
| <i>Clevelandella constricta</i>     | KC139713.1       |
| <i>Clevelandella hastula</i>        | MT675987.1       |
| <i>Clevelandella lynni</i>          | MN966414.1       |
| <i>Clevelandella nipponensis</i>    | KC139714.1       |
| <i>Clevelandella panesthiae</i>     | MT675990.1       |
| <i>Clevelandella parapanesthiae</i> | MT675998.1       |
| <i>Metopus fuscus</i>               | KF607083.1       |
| <i>Metopus hasei</i>                | MH086817.1       |
| <i>Metopus minor</i>                | MH086822.1       |
| <i>Metopus setosus</i>              | KY855536.1       |
| <i>Nyctotheroides cordiformis</i>   | MK084748.1       |
| <i>Nyctotheroides deslierresae</i>  | AF145353.1       |
| <i>Nyctotheroides grimi</i>         | MK087045.1       |
| <i>Nyctotheroides hubeiensis</i>    | KT247989.1       |
| <i>Nyctotheroides parvus</i>        | AF145352.1       |
| <i>Nyctotheroides pyriformis</i>    | KX010599.1       |
| <i>Nyctotherus galerus</i>          | MN966415.1       |
| <i>Nyctotherus ovalis</i>           | AJ222678.1       |
| <i>Nyctotherus sp.</i>              | KC139720.1       |
| <i>Nyctotherus sp.</i>              | KC139721.1       |
| <i>Paraclevelandia brevis</i>       | MT676006.1       |
| <i>Sicuophora multigranularis</i>   | MH301103.1       |
